# Supplementary material for: Cell-Permeable Pentapeptide V5 Inhibits Apoptosis and Enhances Insulin Secretion, Allowing Experimental Single-Donor Islet Transplantation in Mice
Source: Oxford University Press journal article supplement (doi:10.2337/db06-1679), 2007-04-30

**Supplementary Figure 1**

The gene expression of IL-1 beta, TNF-alpha, and Bel-2 in allogenic islet grafts


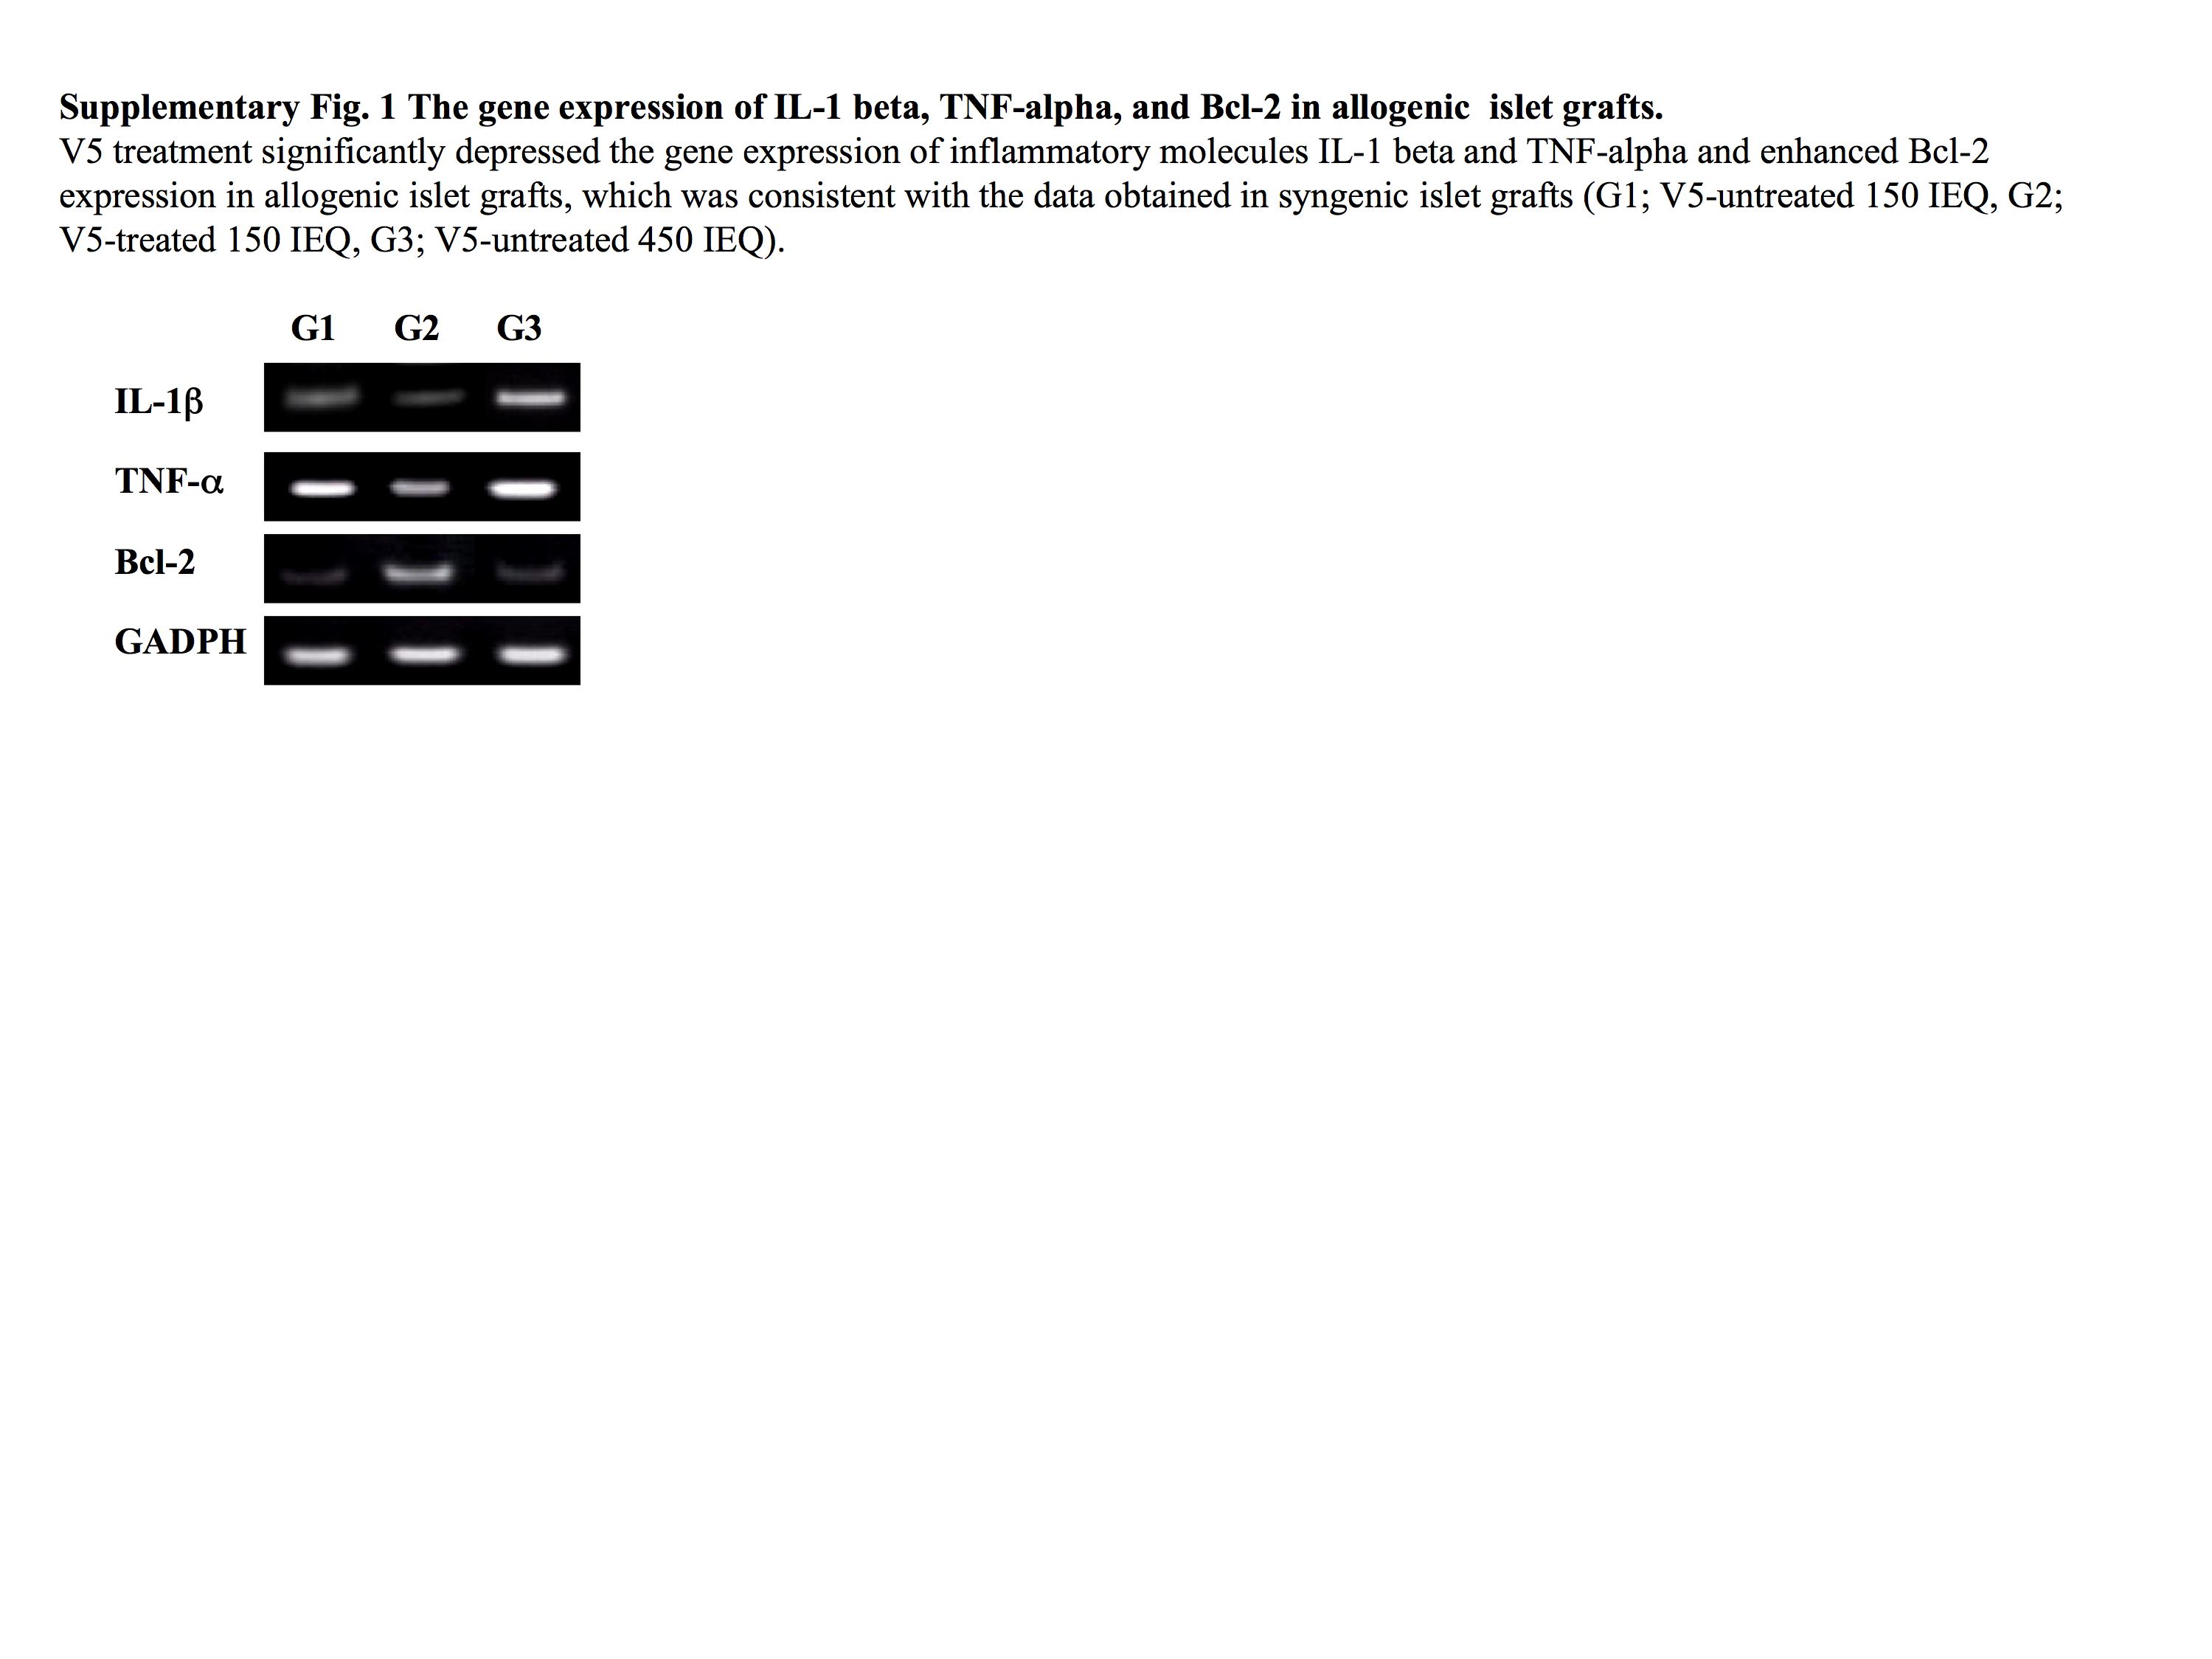

Supplement: db061679-sup-supplementary_figure_1.doc [file db061679-sup-supplementary_figure_1.doc]
